# Supplementary material
Source: MDPI journal article supplement (https://www.mdpi.com/2073-4352/13/4/574)

# Supplemental Information

## Oxygen vacancies in zirconia and their migration: the role of Hubbard-U parameters in Density Functional Theory

Ralph Gebauer

In the following we provide data regarding the convergence of the energy with respect to the basis set size and the k-point sampling. For the test, the  $2 \times 2 \times 2$   $\text{ZrO}_2$  supercell with 96 atoms was chosen. The total energy was calculated for the pristine system and the same system with one oxygen vacancy (95 atoms). The energy difference  $\Delta E$  between the defected and the pristine system was calculated with varying values for the plane wave cutoff  $\text{ecutwfc}$  ( $\text{ecutrho}$  was set to  $10 \times \text{ecutwfc}$ ) and for the number of k-points. The Brillouin zone was sampled with a regular mesh of  $n_k \times n_k \times n_k$  points. In the following graphs, the converged value of  $\Delta E$  has been set to zero for clarity.

The calculations in the main paper have been performed with  $\text{ecutwfc}=40\text{Ry}$  ( $\text{ecutrho}=400\text{Ry}$ ) and  $n_k = 4$ .

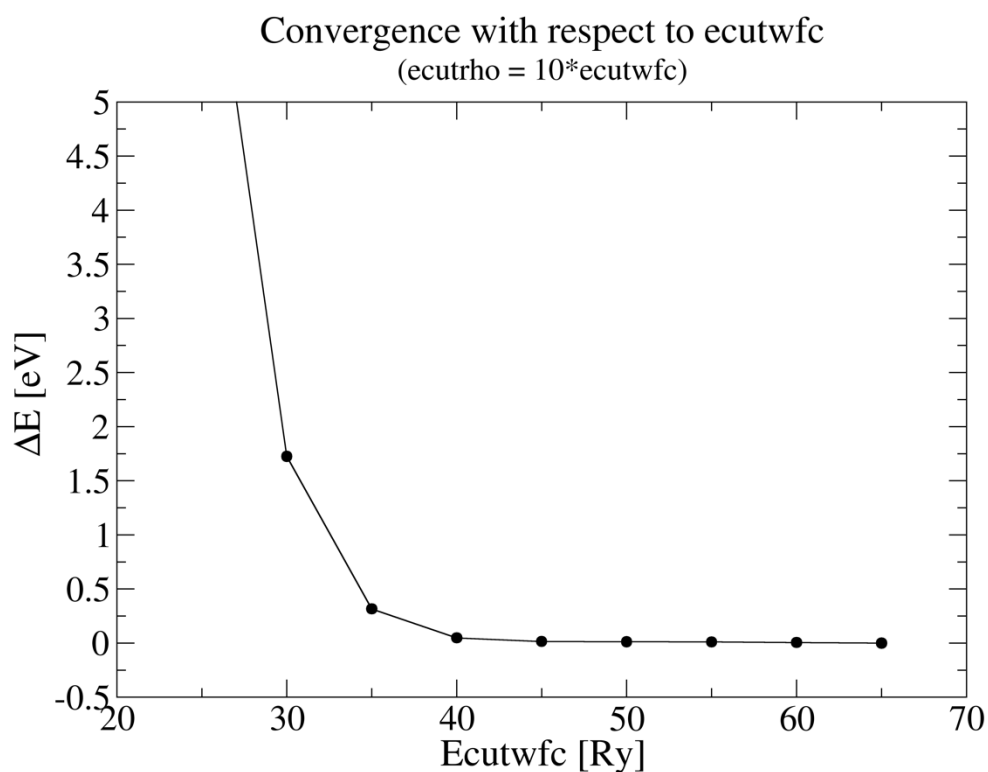

Convergence with respect to k-point sampling  
Regular mesh:  $n_k \times n_k \times n_k$

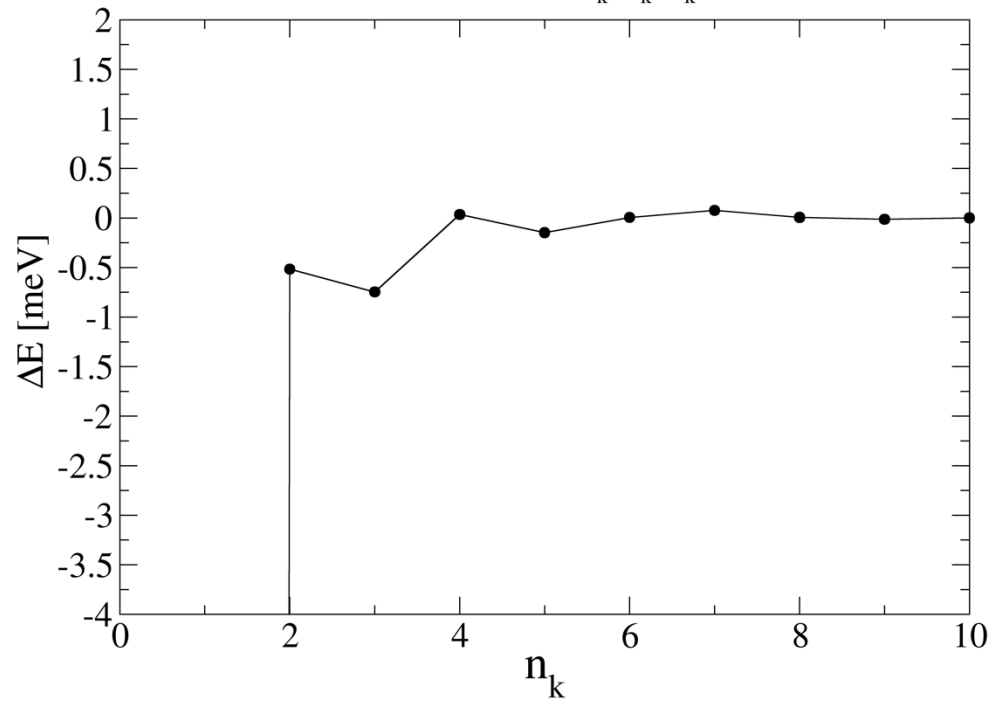

Supplement: s1 [file s1 › crystals-2296550-supplementary.pdf]
